# Supplementary material for: Monitoring and Mapping Vineyard Water Status Using Non-Invasive Technologies by a Ground Robot
Source: MDPI journal article supplement (doi:10.3390/rs13142830), 2021-07-19
Supplement: s1 [file s1]

**Table S1.** Statistical analysis for the Canopy temperature ( $T_c$ ) using the point low-cost sensor (Infrared radiometer SI-421) and the Infrared camera ThermaCAM Flir P640.

| Sample                            | Instrument | n  | Mean         | S.D.        | S.E.E.      | VC   | Min.  | Max.  |
|-----------------------------------|------------|----|--------------|-------------|-------------|------|-------|-------|
| Plant1                            | SI-421     | 40 | 23.60        | 0.46        | 0.07        | 1.93 | 22.65 | 24.13 |
| Plant2                            | SI-421     | 34 | 21.54        | 0.26        | 0.04        | 1.20 | 21.09 | 21.84 |
| Plant3                            | SI-421     | 35 | 23.08        | 0.17        | 0.03        | 0.72 | 22.87 | 23.38 |
| Plant4                            | SI-421     | 37 | 24.41        | 0.35        | 0.06        | 1.41 | 23.64 | 24.69 |
| Plant5                            | SI-421     | 38 | 23.52        | 0.15        | 0.02        | 0.65 | 23.31 | 23.77 |
| Plant6                            | SI-421     | 49 | 23.29        | 0.67        | 0.10        | 2.88 | 22.53 | 24.26 |
| <b>Average Canopy Temperature</b> |            | 39 | <b>23.24</b> | <b>0.34</b> | <b>0.05</b> | 1.47 | 22.68 | 23.68 |
| Plant1                            | Flir P640  | 5  | 24.88        | 0.83        | 0.34        | 3.34 | 23.70 | 25.70 |
| Plant2                            | Flir P640  | 5  | 22.10        | 0.40        | 0.16        | 1.81 | 21.70 | 22.80 |
| Plant3                            | Flir P640  | 5  | 22.30        | 0.42        | 0.19        | 1.90 | 21.60 | 22.60 |
| Plant4                            | Flir P640  | 5  | 23.58        | 0.20        | 0.09        | 0.87 | 23.40 | 23.90 |
| Plant5                            | Flir P640  | 5  | 23.04        | 0.35        | 0.16        | 1.52 | 22.60 | 23.50 |
| Plant6                            | Flir P640  | 5  | 22.72        | 0.56        | 0.25        | 2.46 | 22.10 | 23.50 |
| <b>Average Canopy Temperature</b> |            | 5  | <b>23.10</b> | <b>0.46</b> | <b>0.20</b> | 1.98 | 22.52 | 23.67 |

S.D. Standard deviation; S.E.E. Standard Error of Estimation; VC: Coefficient of Variation (%); Min: Minimum; Max: Maximum.

**Table S2.** Statistical significance for the Canopy temperature ( $T_c$ ), obtained by Analysis of Variance facing the two thermal sensors.

| Variable                          | Canopy temperature (°C) |       |      | $p = 0.7542$ (ns) |
|-----------------------------------|-------------------------|-------|------|-------------------|
|                                   | n                       | Mean  | SE   |                   |
| <b>ThermaCAM Flir P640</b>        | 30                      | 23.16 | 0.19 | $p = 0.7542$ (ns) |
| <b>Infrared radiometer SI-421</b> | 30                      | 23.24 | 0.19 |                   |

“ns” indicates not significant, respectively. For  $T_c$ , mean values ( $n=30$ ) within columns were separated by the Student t-test ( $p = 0.05$ ).

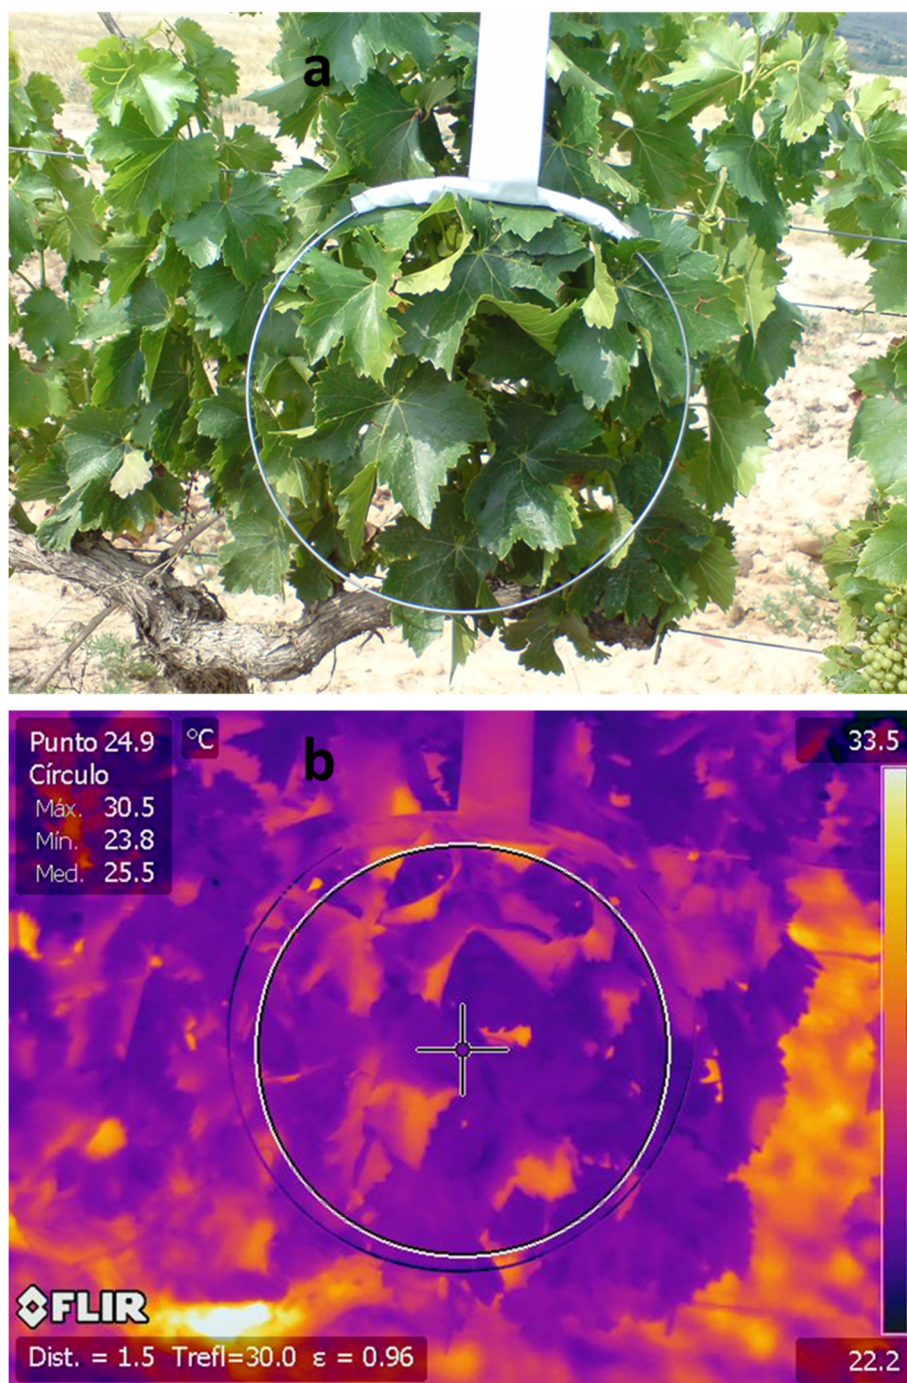

**Figure S1.** (a) RGB image showing the measured area gathered by the Infrared radiometer SI-421, and the infrared thermal image acquired by the ThermoCAM Flir P640 with its selected area (white line) in the grapevine canopy (b).
